# Supplementary material for: Early Detection of Treatment-Induced Mitotic Arrest Using Temporal Diffusion Magnetic Resonance Spectroscopy
Source: PubMed Central journal article supplement — Neoplasia. 2016 Jun 9;18(6):387–97. doi: 10.1016/j.neo.2016.04.006 (PMC4909704; doi:10.1016/j.neo.2016.04.006), 2016-06-09
Supplement: mmc2.pdf [file mmc2.pdf]

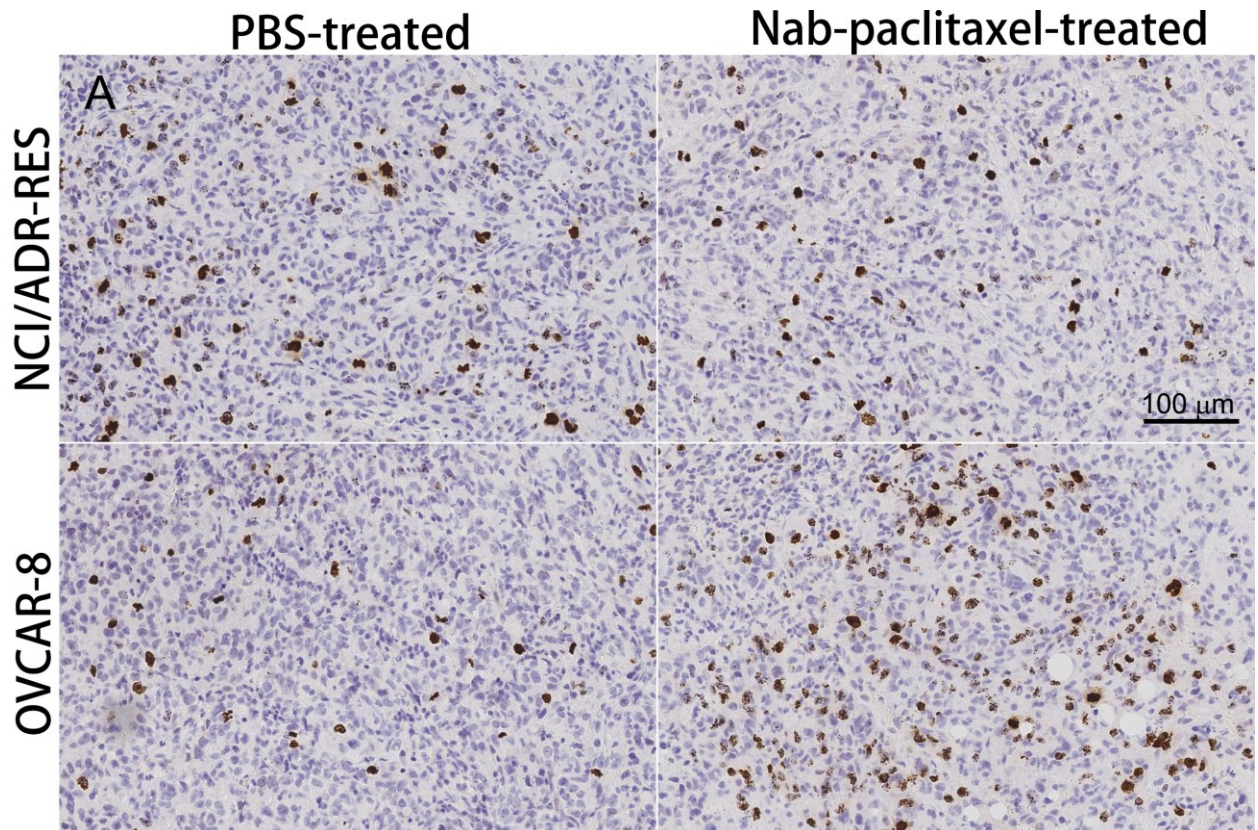

**Supplementary Figure 2.** Representative PHH3-stained slides for either Nab-paclitaxel or PBS treated OVCAR-8 and NCI/ADR-RES tumors.
