# Supplementary material for: Early Detection of Treatment-Induced Mitotic Arrest Using Temporal Diffusion Magnetic Resonance Spectroscopy
Source: PubMed Central journal article supplement — Neoplasia. 2016 Jun 9;18(6):387–97. doi: 10.1016/j.neo.2016.04.006 (PMC4909704; doi:10.1016/j.neo.2016.04.006), 2016-06-09
Supplement: mmc3.pdf [file mmc3.pdf]

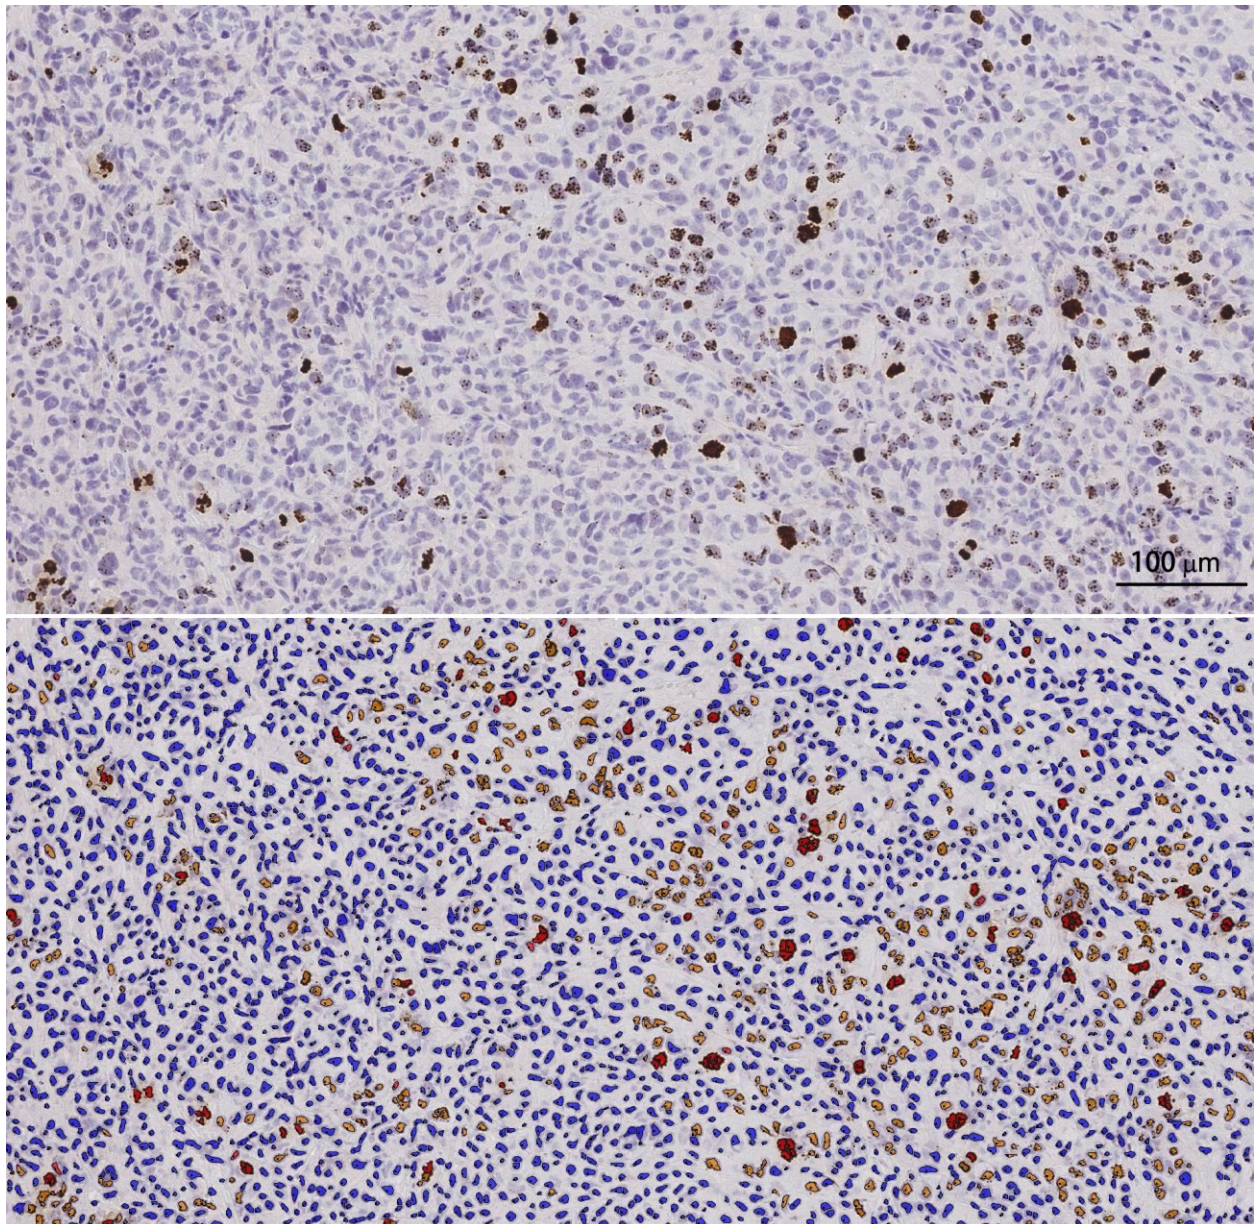

**Supplementary Figure 3.** Segmentation of PHH3-stained histological images. (top) original histological image; (bottom) segmented image where PHH3-positive cells are labelled in either red or brown colors and PHH3-negative cells are labelled in blue.
