# Supplementary material for: Early Detection of Treatment-Induced Mitotic Arrest Using Temporal Diffusion Magnetic Resonance Spectroscopy
Source: PubMed Central journal article supplement — Neoplasia. 2016 Jun 9;18(6):387–97. doi: 10.1016/j.neo.2016.04.006 (PMC4909704; doi:10.1016/j.neo.2016.04.006), 2016-06-09
Supplement: mmc4.pdf [file mmc4.pdf]

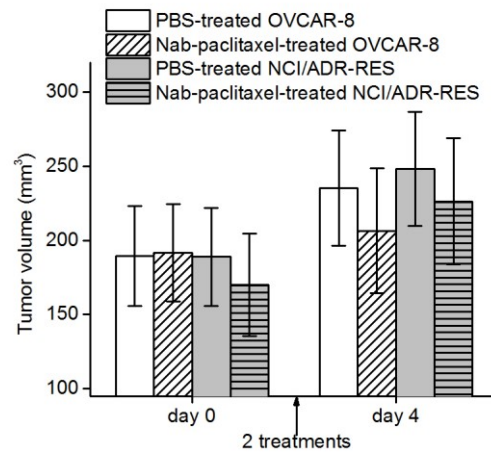

**Supplementary Figure 4.** Tumor volumes measured from T2W MR images for either PBS or Nab-paclitaxel treated xenograft tumors at day 0 and 4. Two treatments (15 mg/kg) were given between day 0 and 4.
