# Supplementary material for: Early Detection of Treatment-Induced Mitotic Arrest Using Temporal Diffusion Magnetic Resonance Spectroscopy
Source: PubMed Central journal article supplement — Neoplasia. 2016 Jun 9;18(6):387–97. doi: 10.1016/j.neo.2016.04.006 (PMC4909704; doi:10.1016/j.neo.2016.04.006), 2016-06-09
Supplement: mmc5.pdf [file mmc5.pdf]

|                 | Nab-<br>paclitaxel<br>concentration<br>(nM) | Sub G <sub>0</sub> | G <sub>0</sub> /G <sub>1</sub> | S phase | G <sub>2</sub> /M | Polypoid |
|-----------------|---------------------------------------------|--------------------|--------------------------------|---------|-------------------|----------|
| NCI/ADR-<br>RES | 0                                           | 0.3%               | 50%                            | 14.1%   | 34%               | 1.6%     |
|                 | 100                                         | 8.8%               | 36.4%                          | 16.4%   | 36.5%             | 3.9%     |
|                 | 500                                         | 2.5%               | 13.2%                          | 8.7%    | 62.2%             | 8.4%     |
| OVCAR-8         | 0                                           | 0.2%               | 48.9%                          | 16.8%   | 32%               | 2.1%     |
|                 | 100                                         | 5.3%               | 16.1%                          | 12.6%   | 64.2%             | 1.8%     |
|                 | 500                                         | 1.5%               | 10.9%                          | 8.9%    | 76.3%             | 2.4%     |

**Supplementary Table 1.** The percentages of OVCAR-8 and NCI/ADR-RES cells treated with different concentrations of Nab-paclitaxel (0, 100, 500 nM) in the different compartments of the cell cycle.
